# Supplementary material for: Biomarkers of Micronutrients in Regular Follow-Up for Tyrosinemia Type 1 and Phenylketonuria Patients
Source: MDPI journal article supplement (doi:10.3390/nu11092011), 2019-08-27
Supplement: s1 [file s1]

**Supplementary material S1.** Micronutrients and minerals in the different amino acid mixtures used in our patient group.

| <b>PKU</b>        |                 |                        |                           |                          |                         |                            |                           |                      |                      |                        |                           |
|-------------------|-----------------|------------------------|---------------------------|--------------------------|-------------------------|----------------------------|---------------------------|----------------------|----------------------|------------------------|---------------------------|
| <b>Supplement</b> | <b>Per Unit</b> | <b>Sodium<br/>(mg)</b> | <b>Potassium<br/>(mg)</b> | <b>Chloride<br/>(mg)</b> | <b>Calcium<br/>(mg)</b> | <b>Phosphorus<br/>(mg)</b> | <b>Magnesium<br/>(mg)</b> | <b>Iron<br/>(mg)</b> | <b>Zinc<br/>(mg)</b> | <b>Copper<br/>(mg)</b> | <b>Manganese<br/>(mg)</b> |
| PKU anamix infant | 100 gram powder | 191                    | 501                       | 355                      | 410                     | 300                        | 58                        | 8.1                  | 5.7                  | 0.43                   | 0.43                      |
| PKU squeeze       | 100 ml          | 107                    | 264                       | 164                      | 306                     | 233                        | 47                        | 4                    | 3.1                  | 0.22                   | 0.48                      |
| PKU 2 shake       | 100 gram powder | <30                    | 560                       | <30                      | 670                     | 395                        | 140                       | 7.9                  | 7.6                  | 0.6                    | 1.1                       |
| PKU lophlex 20    | Sachet (27.8 g) | <5.6                   | <2.8                      | <1.4                     | 356                     | 276                        | 107                       | 5.3                  | 3.9                  | 0.53                   | 0.53                      |
| PKU lophlex 10 LQ | 62.5 ml         | <15                    | 50                        | <15                      | 178                     | 138                        | 53.5                      | 2.6                  | 1.9                  | 0.26                   | 0.26                      |
| PKU lophlex 20 LQ | 125 ml          | <25                    | 100                       | <25                      | 356                     | 276                        | 107                       | 5.3                  | 3.9                  | 0.53                   | 0.53                      |
| PKU 2 mix         | 100 gram powder | 256                    | 540                       | 405                      | 1035                    | 620                        | 142                       | 12.2                 | 8.9                  | 0.96                   | 1.62                      |
| PKU cooler 10     | 100 ml          | 60                     | 140                       | 80                       | 230                     | 205                        | 63                        | 4.2                  | 3.2                  | 0.42                   | 0.48                      |
| PKU cooler 15     | 100 ml          | 60                     | 140                       | 80                       | 230                     | 205                        | 63                        | 4.2                  | 3.2                  | 0.42                   | 0.48                      |
| PKU cooler 20     | 100 ml          | 60                     | 140                       | 80                       | 230                     | 205                        | 63                        | 4.2                  | 3.2                  | 0.42                   | 0.48                      |
| PKU air 10        | 100 ml          | 60                     | 140                       | 80                       | 230                     | 210                        | 63                        | 4.2                  | 3.2                  | 0.42                   | 0.29                      |
| PKU air 15        | 100 ml          | 60                     | 140                       | 80                       | 230                     | 210                        | 63                        | 4.2                  | 3.2                  | 0.42                   | 0.29                      |
| PKU air 20        | 100 ml          | 60                     | 140                       | 80                       | 230                     | 210                        | 63                        | 4.2                  | 3.2                  | 0.42                   | 0.29                      |
| PKU 3 advanta     | 100 gram powder | <20                    | 1760                      | <20                      | 1410                    | 704                        | 511                       | 21                   | 18                   | 1.7                    | 3.5                       |
| PKU 2 fruta       | 100 ml          | <40                    | 280                       | <20                      | 336                     | 198                        | 70                        | 4                    | 3.8                  | 0.29                   | 0.57                      |
| PKU express 20    | 100 gram powder | 508                    | 940                       | 728                      | 1196                    | 1068                       | 376                       | 21.6                 | 21.6                 | 2.2                    | 3.2                       |
| Phlexy 10 tablets | 10 tablets      | <5                     | <5                        | 178                      | <5                      |                            | 13.2                      |                      |                      |                        |                           |
| Phlexy 10 drink   | 20 gram         | <1                     |                           |                          |                         |                            |                           |                      |                      |                        |                           |
| Xphe smart A      | 100 gram powder | 0                      |                           |                          | 1090                    | 733                        | 312                       | 21                   | 11                   | 1.8                    | 5                         |
| Xphe mini's       | 100 gram        |                        | 931                       |                          | 1651                    | 652                        | 401                       | 19                   | 9                    | 1.6                    | 4                         |
| Lophlex sensation | Package (109 g) | <20                    | 98.1                      | <20                      | 356                     | 276                        | 107                       | 5.3                  | 3.9                  | 0.53                   | 0.53                      |
| PKU 3 shake       | Sachet (50 g)   | <15                    | 583                       | <15                      | 423                     | 223                        | 179                       | 7.03                 | 5.29                 | 0.59                   | 1.12                      |

  

| <b>TYR</b>        |                 |     |      |     |      |      |     |     |      |      |      |
|-------------------|-----------------|-----|------|-----|------|------|-----|-----|------|------|------|
| Tyr anamix Infant | 100 gram        | 191 | 501  | 355 | 410  | 300  | 58  | 8.1 | 5.7  | 0.43 | 0.43 |
| Tyr cooler 10     | 100 ml          | 60  | 140  | 80  | 230  | 205  | 63  | 4.2 | 3.2  | 0.42 | 0.29 |
| Tyr cooler 15     | 100 ml          | 60  | 140  | 80  | 230  | 205  | 63  | 4.2 | 3.2  | 0.42 | 0.29 |
| Tyr cooler 20     | 100 ml          | 60  | 140  | 80  | 230  | 205  | 63  | 4.2 | 3.2  | 0.42 | 0.29 |
| Tyr 2 prima       | 100 gram powder | 541 | 1200 | 902 | 2299 | 1380 | 315 | 27  | 19.8 | 2.1  | 3.6  |
| Tyr gel           | 100 gram        | 379 | 938  | 583 | 1083 | 825  | 167 | 14  | 11   | 0.8  | 1.7  |

| PKU               |                 |                  |                    |                  |                  |                |                   |                   |                   |                   |
|-------------------|-----------------|------------------|--------------------|------------------|------------------|----------------|-------------------|-------------------|-------------------|-------------------|
| Supplement        | Per Unit        | Fluoride<br>(mg) | Molybdenum<br>(µg) | Selenium<br>(µg) | Chromium<br>(µg) | Iodine<br>(µg) | Vitamin A<br>(µg) | Vitamin D<br>(µg) | Vitamin E<br>(mg) | Vitamin K<br>(µg) |
| PKU anamix infant | 100 gram powder | 0.7              | 12                 | 15.5             | 13.8             | 83             | 392               | 8.7               | 4.6               | 37.2              |
| PKU squeeze       | 100 ml          |                  |                    | 10               |                  | 39             | 169               | 4.1               | 2.6               | 11.5              |
| PKU 2 shake       | 100 gram powder |                  | 35                 | 24               | 17               | 92             | 430               | 4.3               | 5.8               | 20.6              |
| PKU lophlex 20    | Sachet (27.8 g) |                  | 25                 | 26.7             | 10.6             | 58.4           | 285               | 3.6               | 3.2               | 24.9              |
| PKU lophlex 10 LQ | 62.5 ml         |                  | 12.5               | 13.4             | 5.3              | 29.2           | 143               | 4                 | 1.6               | 12.4              |
| PKU lophlex 20 LQ | 125 ml          |                  | 25                 | 26.8             | 10.6             | 58.4           | 285               | 8                 | 3.2               | 24.9              |
| PKU 2 mix         | 100 gram powder |                  | 43                 | 24.3             | 40.5             | 146            | 810               | 18.9              | 10.8              | 25.2              |
| PKU cooler 10     | 100 ml          |                  | 13                 | 15               | 8                | 49             | 150               | 5.8               | 3                 | 14                |
| PKU cooler 15     | 100 ml          |                  | 13                 | 15               | 8                | 49             | 150               | 5.8               | 3                 | 14                |
| PKU cooler 20     | 100 ml          |                  | 13                 | 15               | 8                | 49             | 150               | 5.8               | 3                 | 14                |
| PKU air 10        | 100 ml          | 1.1              | 13                 | 15               | 8                | 49             | 150               | 5.8               | 3                 | 14                |
| PKU air 15        | 100 ml          |                  | 13                 | 15               | 8                | 49             | 150               | 5.8               | 3                 | 14                |
| PKU air 20        | 100 ml          |                  | 13                 | 15               | 8                | 49             | 150               | 5.8               | 3                 | 14                |
| PKU 3 advanta     | 100 gram powder |                  | 99                 | 77               | 99               | 261            | 1130              | 28                | 16                | 77                |
| PKU 2 fruta       | 100 ml          |                  | 18                 | 12               | 8.8              | 46             | 215               | 2.2               | 2.9               | 10.3              |
| PKU express 20    | 100 gram powder |                  | 144                | 88               | 88               | 252            | 832               | 13.2              | 15.6              | 100               |
| Phlexy 10 tablets | 10 tablets      |                  |                    |                  |                  |                |                   |                   |                   |                   |
| Phlexy 10 drink   | 20 gram         |                  |                    |                  |                  |                |                   |                   |                   |                   |
| Xphe smart A      | 100 gram powder |                  | 105                | 54               | 70               | 246            | 1052              | 8                 | 18                | 77                |
| Xphe mini's       | 100 gram        |                  | 93                 | 48               | 62               | 217            | 931               | 7                 | 16                | 68                |
| Lophlex sensation | Package (109 g) | 0.33             | 25                 | 26.8             | 10.6             | 58.4           | 285               | 8                 | 3.2               | 24.9              |
| PKU 3 shake       | Sachet (50 g)   |                  | 29.7               | 23.2             | 38.5             | 78.4           | 340               | 8.4               | 4.96              | 12.1              |
|                   |                 |                  |                    |                  |                  |                |                   |                   |                   |                   |
| TYR               |                 |                  |                    |                  |                  |                |                   |                   |                   |                   |
| Tyr anamix Infant | 100 gram        | 1.5              | 12                 | 15.5             | 13.8             | 83             | 392               | 8.7               | 4.6               | 37.2              |
| Tyr cooler 10     | 100 ml          |                  | 13                 | 15               | 8                | 49             | 150               | 5.8               | 3                 | 14                |
| Tyr cooler 15     | 100 ml          |                  | 13                 | 15               | 8                | 49             | 150               | 5.8               | 3                 | 14                |
| Tyr cooler 20     | 100 ml          |                  | 13                 | 15               | 8                | 49             | 150               | 5.8               | 3                 | 14                |
| Tyr 2 prima       | 100 gram powder |                  | 94.5               | 54               | 90               | 323            | 1800              | 42                | 19.2              | 51.1              |
| Tyr gel           | 100 gram        |                  | 50                 | 35               | 71               | 138            | 600               | 14.6              | 9                 | 41                |

| PKU               |                 |                    |                    |                    |                    |                    |                    |                     |                    |                   |
|-------------------|-----------------|--------------------|--------------------|--------------------|--------------------|--------------------|--------------------|---------------------|--------------------|-------------------|
| Supplement        | Per Unit        | Vitamin B1<br>(mg) | Vitamin B2<br>(mg) | Vitamin B3<br>(mg) | Vitamin B5<br>(mg) | Vitamin B6<br>(mg) | Folic acid<br>(µg) | Vitamin<br>B12 (µg) | Vitamin B8<br>(µg) | Vitamin C<br>(mg) |
| PKU anamix infant | 100 gram powder | 0.5                | 0.5                | 7.5                | 2.8                | 0.5                | 55                 | 1.2                 | 18.2               | 49                |
| PKU squeeze       | 100 ml          | 0.28               | 0.34               | 4                  | 1.4                | 0.3                | 59                 | 0.56                | 7.1                | 17.7              |
| PKU 2 shake       | 100 gram powder | 0.74               | 0.86               | 5.3                | 3.3                | 0.96               | 1189               | 1.4                 | 28                 | 42                |
| PKU lophlex 20    | Sachet (27.8 g) | 0.42               | 0.5                | 7.1                | 1.8                | 0.58               | 249                | 1.8                 | 53.4               | 17.8              |
| PKU lophlex 10 LQ | 62.5 ml         | 0.21               | 0.25               | 3.6                | 0.88               | 0.29               | 60                 | 0.88                | 26.7               | 8.9               |
| PKU lophlex 20 LQ | 125 ml          | 0.43               | 0.5                | 7.1                | 1.8                | 0.58               | 120                | 1.8                 | 53.4               | 17.8              |
| PKU 2 mix         | 100 gram powder | 1.03               | 1.1                | 19.3               | 5.1                | 0.95               | 130                | 2                   | 27                 | 41                |
| PKU cooler 10     | 100 ml          | 0.4                | 0.44               | 2                  | 1.1                | 0.5                | 58                 | 0.9                 | 7.5                | 21                |
| PKU cooler 15     | 100 ml          | 0.4                | 0.44               | 2                  | 1.1                | 0.5                | 58                 | 0.9                 | 7.5                | 21                |
| PKU cooler 20     | 100 ml          | 0.4                | 0.44               | 2                  | 1.1                | 0.5                | 58                 | 0.9                 | 7.5                | 21                |
| PKU air 10        | 100 ml          | 0.4                | 0.44               | 2                  | 1.1                | 0.5                | 58                 | 0.92                | 7.5                | 21                |
| PKU air 15        | 100 ml          | 0.4                | 0.44               | 2                  | 1.1                | 0.5                | 58                 | 0.92                | 7.5                | 21                |
| PKU air 20        | 100 ml          | 0.4                | 0.44               | 2                  | 1.1                | 0.5                | 58                 | 0.92                | 7.5                | 21                |
| PKU 3 advanta     | 100 gram powder | 1.75               | 2                  | 22.4               | 8.4                | 2.1                | 231                | 4.2                 | 70                 | 119               |
| PKU 2 fruta       | 100 ml          | 0.37               | 0.43               | 2.6                | 1.6                | 0.5                | 59                 | 0.7                 | 14                 | 21                |
| PKU express 20    | 100 gram powder | 2                  | 2.3                | 24.8               | 8                  | 2.8                | 400                | 4.8                 | 188                | 108               |
| Phlexy 10 tablets | 10 tablets      |                    |                    |                    |                    |                    |                    |                     |                    |                   |
| Phlexy 10 drink   | 20 gram         |                    |                    |                    |                    |                    |                    |                     |                    |                   |
| Xphe smart A      | 100 gram powder | 1.8                | 2                  | 28                 | 11                 | 2                  | 632                | 6                   | 175                | 91                |
| Xphe mini's       | 100 gram        | 1.6                | 1.7                | 25                 | 9                  | 1.7                | 559                | 6                   | 155                | 62                |
| Lophlex sensation | Package (109 g) | 0.43               | 0.5                | 7.1                | 1.8                | 0.58               | 120                | 1.8                 | 53.4               | 17.8              |
| PKU 3 shake       | Sachet (50 g)   | 0.52               | 0.6                | 6.72               | 2.52               | 0.62               | 69.2               | 1.25                | 21                 | 35.8              |
| TYR               |                 |                    |                    |                    |                    |                    |                    |                     |                    |                   |
| Tyr anamix Infant | 100 gram        | 0.5                | 0.5                | 8.2                | 2.8                | 0.5                | 55                 | 1.2                 | 18.2               | 49                |
| Tyr cooler 10     | 100 ml          | 0.4                | 0.44               | 2                  | 1.1                | 0.5                | 58                 | 0.9                 | 7.5                | 21                |
| Tyr cooler 15     | 100 ml          | 0.4                | 0.44               | 2                  | 1.1                | 0.5                | 58                 | 0.9                 | 7.5                | 21                |
| Tyr cooler 20     | 100 ml          | 0.4                | 0.44               | 2                  | 1.1                | 0.5                | 58                 | 0.9                 | 7.5                | 21                |
| Tyr 2 prima       | 100 gram powder | 2.3                | 2.4                | 22.8               | 11.4               | 2.1                | 230                | 4.5                 | 60                 | 90                |
| Tyr gel           | 100 gram        | 1                  | 1.2                | 14                 | 5                  | 1.1                | 208                | 2                   | 25                 | 63                |
